# Supplementary material for: Motivation and Basic Psychological Needs Satisfaction in Active Travel to Different Destinations: A Cluster Analysis with Adolescents Living in Germany
Source: MDPI journal article supplement (doi:10.3390/bs13030272), 2023-03-20
Supplement: s1 [file s1]

Supplementary Table S2. Overview on the amount of adolescents reporting to travel a distance (category) to friends or relatives, shopping facilities or leisure facilities across clusters and mean distance to school per cluster.

|                                  |                                                 | Cluster        |                |                |                |                |                |                |
|----------------------------------|-------------------------------------------------|----------------|----------------|----------------|----------------|----------------|----------------|----------------|
|                                  |                                                 | 1              | 2              | 3              | 4              | 5              | 6              | total          |
| Distance to friends or relatives | less than 500m                                  | 13             | 10             | 11             | 18             | 10             | 11             | 73             |
|                                  | 500m-1km                                        | 19             | 11             | 13             | 19             | 17             | 33             | 112            |
|                                  | 1km-2km                                         | 10             | 15             | 12             | 17             | 25             | 32             | 111            |
|                                  | 2km-3km                                         | 11             | 6              | 9              | 5              | 10             | 17             | 58             |
|                                  | 3km-5km                                         | 7              | 9              | 9              | 10             | 4              | 19             | 58             |
|                                  | more than 5km                                   | 21             | 19             | 13             | 10             | 17             | 20             | 100            |
|                                  | total                                           | 81             | 70             | 67             | 79             | 83             | 132            | 512            |
| Distance to shopping facilities  | less than 500m                                  | 11             | 8              | 7              | 14             | 9              | 17             | 66             |
|                                  | 500m-1km                                        | 29             | 19             | 21             | 22             | 36             | 41             | 168            |
|                                  | 1km-2km                                         | 12             | 21             | 14             | 20             | 17             | 33             | 117            |
|                                  | 2km-3km                                         | 5              | 5              | 8              | 11             | 7              | 14             | 50             |
|                                  | 3km-5km                                         | 7              | 9              | 9              | 2              | 10             | 11             | 48             |
|                                  | more than 5km                                   | 15             | 8              | 9              | 10             | 3              | 17             | 62             |
|                                  | total                                           | 79             | 70             | 68             | 79             | 82             | 133            | 511            |
| Distance to leisure facilities   | less than 500m                                  | 11             | 8              | 7              | 10             | 14             | 15             | 65             |
|                                  | 500m-1km                                        | 15             | 18             | 11             | 21             | 22             | 27             | 114            |
|                                  | 1km-2km                                         | 14             | 15             | 16             | 17             | 18             | 25             | 105            |
|                                  | 2km-3km                                         | 10             | 8              | 9              | 8              | 10             | 21             | 66             |
|                                  | 3km-5km                                         | 9              | 7              | 11             | 12             | 7              | 19             | 65             |
|                                  | more than 5km                                   | 21             | 11             | 11             | 9              | 11             | 22             | 85             |
|                                  | total                                           | 80             | 67             | 65             | 77             | 82             | 129            | 500            |
| Mean distance to school in km    | Displayed as mean distance (standard deviation) | 6.78<br>(0.60) | 7.74<br>(0.78) | 6.67<br>(0.65) | 6.85<br>(0.67) | 5.67<br>(0.54) | 6.03<br>(0.44) | 6.54<br>(5.46) |
