# Supplementary material for: Motivation and Basic Psychological Needs Satisfaction in Active Travel to Different Destinations: A Cluster Analysis with Adolescents Living in Germany
Source: MDPI journal article supplement (doi:10.3390/bs13030272), 2023-03-20
Supplement: s1 [file s1]

Supplementary Table S1. Count, expected count, percentage amount of adolescents traveling active or passive per cluster and adjusted residuals for travel mode to the examined destinations across the identified clusters.

|                                    |         |                    | Cluster |        |        |        |        |        |       |
|------------------------------------|---------|--------------------|---------|--------|--------|--------|--------|--------|-------|
|                                    |         |                    | 1       | 2      | 3      | 4      | 5      | 6      | total |
| Travel mode to school              | passive | Count              | 57      | 41     | 38     | 43     | 35     | 58     | 272   |
|                                    |         | Expected Count     | 42.615  | 36.828 | 36.302 | 41.563 | 44.193 | 70.499 | 272   |
|                                    |         | % of Cluster       | 70.4%   | 58.6%  | 55.1%  | 54.4%  | 41.7%  | 43.3%  | 52.6% |
|                                    |         | Adjusted Residuals | 3.486   | 1.074  | 0.440  | 0.352  | -2.195 | -2.512 |       |
|                                    | active  | Count              | 24      | 29     | 31     | 36     | 49     | 76     | 245   |
|                                    |         | Expected Count     | 38.385  | 33.172 | 32.698 | 37.437 | 39.807 | 63.501 | 245   |
|                                    |         | % of Cluster       | 29.6%   | 41.4%  | 44.9%  | 45.6%  | 58.3%  | 56.7%  | 47.4% |
|                                    |         | Adjusted Residuals | -3.486  | -1.074 | -0.440 | -0.352 | 2.195  | 2.512  |       |
| total                              | Count   | 81                 | 70      | 69     | 79     | 84     | 134    | 517    |       |
| Travel mode from school            | passive | Count              | 54      | 40     | 38     | 45     | 36     | 58     | 271   |
|                                    |         | Expected Count     | 42.458  | 36.692 | 36.168 | 41.41  | 44.031 | 70.24  | 271   |
|                                    |         | % of Cluster       | 66.7%   | 57.1%  | 55.1%  | 57.0%  | 42.9%  | 43.3%  | 52.4% |
|                                    |         | Adjusted Residuals | 2.796   | 0.851  | 0.474  | 0.879  | -1.917 | -2.460 |       |
|                                    | active  | Count              | 27      | 30     | 31     | 34     | 48     | 76     | 246   |
|                                    |         | Expected Count     | 38,542  | 33,308 | 32,832 | 37,59  | 39,969 | 63,76  | 246   |
|                                    |         | % of Cluster       | 33,3%   | 42,9%  | 44,9%  | 43,0%  | 57,1%  | 56,7%  | 47.6% |
|                                    |         | Adjusted Residuals | -2,796  | -0,851 | -0,474 | -0,879 | 1,917  | 2,460  |       |
| total                              | Count   | 81                 | 70      | 69     | 79     | 84     | 134    | 517    |       |
| Travel mode to friends / relatives | passive | Count              | 36      | 25     | 21     | 15     | 23     | 19     | 139   |
|                                    |         | Expected Count     | 21.676  | 18.967 | 18.696 | 21.405 | 22.489 | 35.766 | 139   |
|                                    |         | % of Cluster       | 45.0%   | 35.7%  | 30.4%  | 19.0%  | 27.7%  | 14.4%  | 27.1% |
|                                    |         | Adjusted Residuals | 3.922   | 1.746  | 0.671  | -1.763 | 0.138  | -3.810 |       |
|                                    | active  | Count              | 44      | 45     | 48     | 64     | 60     | 113    | 374   |
|                                    |         | Expected Count     | 58.324  | 51.033 | 50.304 | 57.595 | 60.511 | 96.234 | 374   |
|                                    |         | % of Cluster       | 55.0%   | 64.3%  | 69.6%  | 81.0%  | 72.3%  | 85.6%  | 72.9% |
|                                    |         | Adjusted Residuals | -3.922  | -1.746 | -0.671 | 1.763  | -0.138 | 3.810  |       |
| total                              | Count   | 80                 | 70      | 69     | 79     | 83     | 132    | 513    |       |
| Travel mode to shopping facilities | passive | Count              | 26      | 26     | 19     | 17     | 17     | 27     | 132   |
|                                    |         | Expected Count     | 19.575  | 17.723 | 17.459 | 20.369 | 21.427 | 35.447 | 132   |
|                                    |         | % of Cluster       | 35.1%   | 38.8%  | 28.8%  | 22.1%  | 21.0%  | 20.1%  | 26.5% |
|                                    |         | Adjusted Residuals | 1.835   | 2.464  | 0.462  | -0.946 | -1.218 | -1.934 |       |
|                                    | active  | Count              | 48      | 41     | 47     | 60     | 64     | 107    | 367   |
|                                    |         | Expected Count     | 54.425  | 49.277 | 48.541 | 56.631 | 59.573 | 98.553 | 367   |
|                                    |         | % of Cluster       | 64.9%   | 61.2%  | 71.2%  | 77.9%  | 79.0%  | 79.9%  | 73.5% |
|                                    |         | Adjusted Residuals | -1.835  | -2.464 | -0.462 | 0.946  | 1.218  | 1.934  |       |
| total                              | Count   | 74                 | 67      | 66     | 77     | 81     | 134    | 499    |       |
| Travel mode to leisure facilities  | passive | Count              | 37      | 26     | 25     | 18     | 18     | 29     | 153   |
|                                    |         | Expected Count     | 23.609  | 20.543 | 20.543 | 23.303 | 25.142 | 39.86  | 153   |
|                                    |         | % of Cluster       | 48.1%   | 38.8%  | 37.3%  | 23.7%  | 22.0%  | 22.3%  | 30.7% |
|                                    |         | Adjusted Residuals | 3.599   | 1.554  | 1.269  | -1.433 | -1.871 | -2.402 |       |
|                                    | active  | Count              | 40      | 41     | 42     | 58     | 64     | 101    | 346   |
|                                    |         | Expected Count     | 53.391  | 46.457 | 46.457 | 52.697 | 56.858 | 90.14  | 346   |
|                                    |         | % of Cluster       | 51.9%   | 61.2%  | 62.7%  | 76.3%  | 78.0%  | 77.7%  | 69.3% |
|                                    |         | Adjusted Residuals | -3.599  | -1.554 | -1.269 | 1.433  | 1.871  | 2.402  |       |
| total                              | Count   | 77                 | 67      | 67     | 76     | 82     | 130    | 499    |       |

Note: Table cells highlighted in grey show adjusted residuals that exceed the threshold of +/- 1.96.
